# Supplementary material
Source: PubMed Central journal article supplement (PMC3198343)
Supplement: 1113888108_pnas.201113888SI.pdf [file 1113888108_pnas.201113888SI.pdf]

# Supporting Information

Xu et al. 10.1073/pnas.1113888108

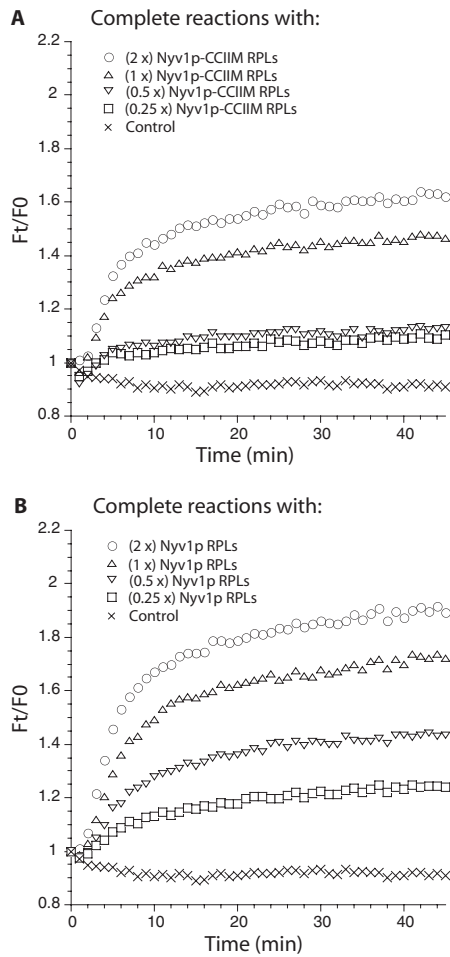

Fig. S1. A comparison of the activities of Nyv1p and Nyv1p-CCIIIM in complete reactions. This experiment is typical of those averaged in Fig. 3.  $F_0$ , fluorescent signal at 0 min;  $F_t$ , fluorescent signal at a given time.
